# Supplementary material for: A Low-Intensity, Hybrid Design between a “Traditional” and a “Course-Based” Research Experience Yields Positive Outcomes for Science Undergraduate Freshmen and Shows Potential for Large-Scale Application
Source: Atypon-hosted journal article supplement (doi:10.1187/cbe.17-11-0248), 2018-10-18
Supplement: combinedsupmats.pdf [file combinedsupmats.pdf]

# Supplemental Material

*CBE—Life Sciences Education*

Rodrigo-Peirís *et al.*

Supplemental online materials for *A low-intensity, hybrid design between a “traditional” and a “course-based” research experience yields positive outcomes for science undergraduate freshmen and shows potential for large-scale application*

Thushani Rodrigo-Peiris, Lin Xiang, and Vincent M. Cassone\*

\*Corresponding author. Email: vincent.cassone@uky.edu

This supplement contains the following:

| Item                                                                                                                                                                                                                                          | Page |
|-----------------------------------------------------------------------------------------------------------------------------------------------------------------------------------------------------------------------------------------------|------|
| Table S1. SRE research projects in Spring 2015                                                                                                                                                                                                | S2   |
| Table S2. Details of the courses used for STEM academic performance evaluations                                                                                                                                                               | S3   |
| Table S3. Percentage student respondents to Likert-scale survey items                                                                                                                                                                         | S4   |
| Figure S1. Descriptive data comparison for retention in a STEM major between STEMcats and non-STEMcats control.                                                                                                                               | S5   |
| Table S4. Summary of comparative descriptive statistics of targeted outcomes                                                                                                                                                                  | S6   |
| Table S5. Summary of bivariate correlations between STEMcats participation and outcomes                                                                                                                                                       | S7   |
| Table S6. The corresponding evaluation phase, activity and outcome from the Corwin model for selected survey items from STEMcats Survey 1 for assessing perceived gains from SRE toward enhancing STEM retention                              | S8   |
| Figure S2. Descriptive data comparison for STEM academic performance outcomes between STEMcats and non-STEMcats control, as of end of the sophomore-year.                                                                                     | S9   |
| Table S7. Multiple linear regression predicting course enrollment, credit enrollment and course pass-rate for lower-division STEM courses, as of the end of sophomore-year, for STEMcats and control groups from Biology and Chemistry majors | S10  |
| Table S8. Multiple linear regression predicting credits earned and GPA for lower-division STEM courses, as of the end of sophomore-year, for STEMcats and control groups from Biology and Chemistry majors                                    | S11  |
| Table S9. Multiple linear regression predicting course enrollment, credit enrollment and course pass-rate for upper-division STEM courses, as of the end of sophomore-year, for STEMcats and control groups from Biology and Chemistry majors | S12  |
| Table S10. Multiple linear regression predicting credits earned and GPA for upper-division STEM courses, as of the end of sophomore-year, for STEMcats and control groups from Biology and Chemistry majors                                   | S13  |

**Table S1.** SRE research projects in Spring 2015

| STEM research discipline                      | Research project title                                                                           |
|-----------------------------------------------|--------------------------------------------------------------------------------------------------|
| Biology - Molecular and Developmental Biology | Analysis of Gene Expression During Salamander Tail Regeneration                                  |
| Biomedical Engineering                        | Cell Mechanobiology and Tissue Bioengineering: Pressuring Cells to Form Vessels                  |
| Biomedical Science                            | Cerebrovascular Aging: Micro-bleeds, Transcriptional Profiling, and <i>in vitro</i> Modeling     |
| Chemistry                                     | Clean Water through Chemistry                                                                    |
| Biomedical Science                            | Daily Changes in Skin Temperature Inversely Correlate with Heart Rate                            |
| Biomedical Science                            | Drug Interactions in Breast Cancer                                                               |
| Biology - Animal Ecology                      | Ecotoxicology and Environmental Health                                                           |
| Biology - Cell Biology                        | Effect of Autophagy on Progesterone Production in Cultured Cells                                 |
| Biology - Human Physiology                    | Meditation, Sleep, and Performance                                                               |
| Agriculture - Plant Biotechnology             | Natural Products from Plants and their Uses                                                      |
| Agriculture - Plant Pathology                 | Novel Strategies for Biological Control of Bacterial Wilt of Cucurbits Under Organic Cultivation |
| Biology - Genetics                            | Sex, Flies, and Good Gene Hunting – Section I                                                    |
| Biology - Genetics                            | Sex, Flies, and Good Gene Hunting – Section II                                                   |
| Biology - Genetics                            | Sex, Flies, and Good Gene Hunting – Section III                                                  |
| Biology - Genetics                            | Sex, Flies, and Good Gene Hunting – Section IV                                                   |
| Biomedical Science                            | Regulation of Cardiomyocyte Calcium Homeostasis                                                  |
| Chemistry                                     | Student Centered Original Research Experience (SCORE)                                            |
| Biology - Plant Ecology                       | The Acclimating Leaf                                                                             |
| Biomedical Science                            | The Role of Inflammation in Alzheimer's Disease Pathology                                        |
| Environment and Earth Sciences                | Tracking Contaminants in Central Kentucky Watersheds                                             |

**Table S2.** Details of the courses used for STEM academic performance evaluations

| Course prefix and number    | Department | Course title                                      | Lecture, laboratory and/or recitation | Number of credit hours |
|-----------------------------|------------|---------------------------------------------------|---------------------------------------|------------------------|
| Lower-division STEM courses |            |                                                   |                                       |                        |
| BIO 148                     | Biology    | INTRODUCTORY BIOLOGY I                            | Lecture                               | 3                      |
| BIO 155                     | Biology    | LABORATORY FOR INTRODUCTORY BIOLOGY I             | Laboratory                            | 1                      |
| BIO 152                     | Biology    | PRINCIPLES OF BIOLOGY II                          | Lecture                               | 3                      |
| CHE 105                     | Chemistry  | GENERAL COLLEGE CHEMISTRY I                       | Lecture                               | 4                      |
| CHE 111                     | Chemistry  | LABORATORY TO ACCOMPANY GENERAL CHEMISTRY I       | Laboratory                            | 1                      |
| CHE 107                     | Chemistry  | GENERAL COLLEGE CHEMISTRY II                      | Lecture                               | 3                      |
| CHE 113                     | Chemistry  | LABORATORY TO ACCOMPANY GENERAL CHEMISTRY II      | Laboratory                            | 2                      |
| MA 113                      | Math       | 113 CALCULUS I                                    | Lecture + recitation                  | 4                      |
| MA 137                      | Math       | CALCULUS I WITH LIFE SCIENCE APPLICATIONS         | Lecture + recitation                  | 4                      |
| MA 114                      | Math       | CALCULUS II                                       | Lecture + recitation                  | 4                      |
| MA 138                      | Math       | MA 138 CALCULUS II WITH LIFE SCIENCE APPLICATIONS | Lecture + recitation                  | 4                      |
| Upper-division STEM courses |            |                                                   |                                       |                        |
| BIO 303                     | Biology    | INTRODUCTION TO EVOLUTION                         | Lecture + recitation                  | 4                      |
| BIO 304                     | Biology    | PRINCIPLES OF GENETICS                            | Lecture + laboratory                  | 4                      |
| BIO 315                     | Biology    | INTRODUCTION TO CELL BIOLOGY                      | Lecture + laboratory                  | 4                      |
| BIO 325                     | Biology    | ECOLOGY                                           | Lecture + laboratory                  | 4                      |
| BIO 350                     | Biology    | ANIMAL PHYSIOLOGY                                 | Lecture + laboratory                  | 4                      |
| BIO 430G                    | Biology    | PLANT PHYSIOLOGY                                  | Lecture + laboratory                  | 4                      |
| CHE 230                     | Chemistry  | ORGANIC CHEMISTRY I                               | Lecture                               | 3                      |
| CHE 231                     | Chemistry  | ORGANIC CHEMISTRY LABORATORY I                    | Laboratory                            | 1                      |
| CHE 232                     | Chemistry  | ORGANIC CHEMISTRY II                              | Lecture                               | 3                      |
| PHY 211                     | Physics    | GENERAL PHYSICS                                   | Lecture + laboratory + recitation     | 5                      |
| PHY 213                     | Physics    | GENERAL PHYSICS                                   | Lecture + laboratory + recitation     | 5                      |

**Table S3.** Percentage student respondents to Likert-scale survey items

| Survey item from STEMCats Survey 1                                                                                       | Percentage of respondents (%) |                           |                              |                                       |                           |                        |                           |
|--------------------------------------------------------------------------------------------------------------------------|-------------------------------|---------------------------|------------------------------|---------------------------------------|---------------------------|------------------------|---------------------------|
|                                                                                                                          | Strongly Disagree [Likert 1]  | Quite Disagree [Likert 2] | Somewhat Disagree [Likert 3] | Neither Agree nor Disagree [Likert 4] | Somewhat Agree [Likert 5] | Quite Agree [Likert 6] | Strongly Agree [Likert 7] |
| Authentic Research (n = 93)                                                                                              | 1.08                          | 1.08                      | 3.23                         | 2.15                                  | 19.35                     | 35.48                  | 37.63                     |
| Supportive Environment (n = 91)                                                                                          | 0.00                          | 2.20                      | 1.10                         | 7.69                                  | 17.58                     | 25.27                  | 46.15                     |
| Improved your scientific thinking (n = 90)                                                                               | 1.11                          | 1.11                      | 2.22                         | 8.89                                  | 20.00                     | 28.89                  | 37.78                     |
| Improved your science/STEM knowledge (n = 90)                                                                            | 1.11                          | 0.00                      | 1.11                         | 8.89                                  | 26.67                     | 36.67                  | 25.56                     |
| Improved your experimentation skills (n = 91)                                                                            | 0.00                          | 2.20                      | 2.20                         | 4.40                                  | 19.78                     | 32.97                  | 38.46                     |
| Improved your comfort level with other STEM students (n = 92)                                                            | 1.09                          | 0.00                      | 0.00                         | 10.87                                 | 28.26                     | 27.17                  | 32.61                     |
| Improved your comfort-level with faculty (n = 92)                                                                        | 1.09                          | 0.00                      | 2.17                         | 2.17                                  | 27.17                     | 30.43                  | 36.96                     |
| Enhanced your sense that you are part of a group (n = 91)                                                                | 2.20                          | 1.10                      | 2.20                         | 7.69                                  | 30.77                     | 28.57                  | 27.47                     |
| Enhanced your motivation/enthusiasm for STEM (n = 93)                                                                    | 2.15                          | 1.08                      | 1.08                         | 16.13                                 | 23.66                     | 22.58                  | 33.33                     |
| Enhanced your motivation towards accomplishing graduation from your STEM degree (n = 91)                                 | 0.00                          | 2.20                      | 5.49                         | 5.49                                  | 19.78                     | 32.97                  | 34.07                     |
| Enhanced your critical thinking (n = 90)                                                                                 | 2.22                          | 0.00                      | 2.22                         | 5.56                                  | 21.11                     | 40.00                  | 28.89                     |
| Enhanced your trouble-shooting skills (n = 90)                                                                           | 1.11                          | 1.11                      | 2.22                         | 10.00                                 | 26.67                     | 30.00                  | 28.89                     |
| Enhanced your knowledge in scientific communication (n = 91)                                                             | 1.10                          | 1.10                      | 1.10                         | 6.59                                  | 24.18                     | 36.26                  | 29.67                     |
| Enhanced your teamwork skills (n = 89)                                                                                   | 2.25                          | 0.00                      | 2.25                         | 6.74                                  | 24.72                     | 32.58                  | 31.46                     |
| Enhanced your comfort level to work with colleagues from different academic backgrounds (e.g. different majors) (n = 89) | 0.00                          | 1.12                      | 2.25                         | 7.87                                  | 24.72                     | 32.58                  | 31.46                     |
| Improved your sense that science is connected to human lives (n = 90)                                                    | 0.00                          | 0.00                      | 1.11                         | 12.22                                 | 15.56                     | 26.67                  | 44.44                     |
| Improved your sense that science is important to resolve real world issues (n = 91)                                      | 1.10                          | 0.00                      | 2.20                         | 8.79                                  | 21.98                     | 25.27                  | 40.66                     |
| Enhanced your motivation towards learning STEM (n = 90)                                                                  | 2.22                          | 2.22                      | 4.44                         | 7.78                                  | 18.89                     | 31.11                  | 33.33                     |
| Improved your science/STEM knowledge (n = 90)                                                                            | 1.11                          | 0.00                      | 1.11                         | 8.89                                  | 26.67                     | 36.67                  | 25.56                     |
| Improved your understanding of scientific concepts (n = 91)                                                              | 1.10                          | 0.00                      | 1.10                         | 6.59                                  | 27.47                     | 32.97                  | 30.77                     |

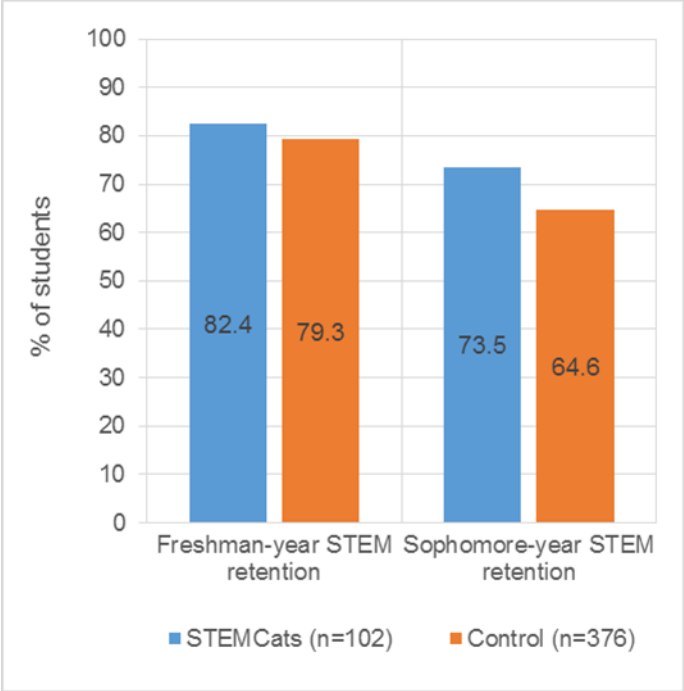

**Figure S1.** Descriptive data comparison for retention in a STEM major between STEM Cats and non-STEM Cats control. Percentage STEM retention for the freshman-year and sophomore-year are depicted. z-test for proportions between STEM Cats and control was not statistically significant at  $\alpha = 0.05$ . Further details are available in Supplemental Table S4.

**Table S4.** Summary of comparative descriptive statistics of targeted outcomes

| Variable                               | STEMCats |      |       |       | Control |      |       |       | Statistical test outcome <sup>‡</sup> |                                        | Effect size |
|----------------------------------------|----------|------|-------|-------|---------|------|-------|-------|---------------------------------------|----------------------------------------|-------------|
|                                        | N        | %    | Mean  | SD    | N       | %    | Mean  | SD    | z score                               | t (df)                                 | Hedges's g  |
| <b>Retention</b>                       |          |      |       |       |         |      |       |       |                                       |                                        |             |
| Freshman-year STEM retention           | 102      | 82.4 |       |       | 376     | 79.3 |       |       | 0.69<br>( <i>p</i> = 0.490)           |                                        |             |
| Sophomore-year STEM retention          | 102      | 73.5 |       |       | 376     | 64.6 |       |       | 1.70<br>( <i>p</i> = 0.091)           |                                        |             |
| <b>Lower division STEM courses</b>     |          |      |       |       |         |      |       |       |                                       |                                        |             |
| Course enrollment                      | 103      |      | 6.44  | 2.48  | 376     |      | 5.72  | 2.48  |                                       | 2.61**<br>(477)<br>( <i>p</i> = 0.009) | 0.29        |
| Credit enrollment                      | 103      |      | 16.96 | 7.00  | 376     |      | 14.90 | 6.77  |                                       | 2.72**<br>(477)<br>( <i>p</i> = 0.007) | 0.30        |
| Course pass-rate <sup>†</sup>          | 96       |      | 89.62 | 20.34 | 354     |      | 82.27 | 28.54 |                                       | 2.36*<br>(448)<br>( <i>p</i> = 0.018)  | 0.27        |
| Earned STEM credits                    | 103      |      | 15.46 | 7.60  | 376     |      | 12.97 | 7.64  |                                       | 2.93**<br>(477)<br>( <i>p</i> = 0.004) | 0.33        |
| STEM GPA <sup>†</sup><br>(0.00 – 4.00) | 96       |      | 2.68  | 0.92  | 343     |      | 2.66  | 1.04  |                                       | 0.17<br>(437)<br>( <i>p</i> = 0.865)   | 0.02        |
| <b>Upper division STEM courses</b>     |          |      |       |       |         |      |       |       |                                       |                                        |             |
| Course enrollment                      | 103      |      | 2.40  | 2.30  | 376     |      | 2.15  | 2.23  |                                       | 1.00<br>(477)<br>( <i>p</i> = 0.317)   | 0.11        |
| Credit enrollment                      | 103      |      | 7.26  | 7.50  | 376     |      | 6.35  | 7.04  |                                       | 1.15<br>(477)<br>( <i>p</i> = 0.252)   | 0.13        |
| Course pass-rate <sup>†</sup>          | 62       |      | 95.32 | 14.05 | 213     |      | 92.60 | 22.33 |                                       | 0.91<br>(273)<br>( <i>p</i> = 0.365)   | 0.13        |
| Earned STEM credits                    | 103      |      | 6.93  | 7.43  | 376     |      | 6.05  | 6.98  |                                       | 1.12<br>(477)<br>( <i>p</i> = 0.264)   | 0.12        |
| STEM GPA <sup>†</sup><br>(0.00 – 4.00) | 62       |      | 2.89  | 0.79  | 209     |      | 2.90  | 0.88  |                                       | 0.08<br>(269)<br>( <i>p</i> = 0.936)   | -0.01       |

<sup>‡</sup>z-test for proportions, and independent samples t-test for means

<sup>†</sup>Percentage of passed courses per student, calculation is limited to the number of students who took the respective courses

\**p* < 0.05; \*\**p* < 0.01 (two-tailed)

**Table S5.** Summary of bivariate correlations between STEMcats participation and outcomes

| Variable                                  | 1. | 2.    | 3.      | 4.      | 5.      | 6.      | 7.      | 8.      | 9.      | 10.     | 11.     | 12.     | 13.     |
|-------------------------------------------|----|-------|---------|---------|---------|---------|---------|---------|---------|---------|---------|---------|---------|
| 1. STEMcats participation                 | 1  | 0.032 | 0.077   | 0.118** | 0.124** | 0.111*  | 0.133** | 0.008   | 0.045   | 0.052   | 0.055   | 0.051   | -0.006  |
| 2. Freshman-year STEM retention           |    | 1     | 0.654** | 0.357** | 0.359** | 0.307** | 0.384** | 0.301** | 0.419** | 0.390** | 0.067   | 0.377** | 0.008   |
| 3. Sophomore-year STEM retention          |    |       | 1       | 0.329** | 0.338** | 0.322** | 0.388** | 0.372** | 0.523** | 0.499** | 0.176** | 0.489** | 0.123*  |
| 4. Lower division STEM course Enrollment  |    |       |         | 1       | 0.987** | 0.511** | 0.926** | 0.367** | 0.379** | 0.331** | 0.016   | 0.316** | -0.132* |
| 5. Lower division STEM credit enrollment  |    |       |         |         | 1       | 0.483** | 0.933** | 0.367** | 0.387** | 0.339** | 0.017   | 0.323** | -0.122* |
| 6. Lower division STEM course pass-rate   |    |       |         |         |         | 1       | 0.722** | 0.705** | 0.478** | 0.442** | 0.200** | 0.433** | 0.231** |
| 7. Lower division STEM credits earned     |    |       |         |         |         |         | 1       | 0.581** | 0.504** | 0.452** | 0.089   | 0.437** | -0.014  |
| 8. Lower division STEM GPA                |    |       |         |         |         |         |         | 1       | 0.684** | 0.644** | 0.292** | 0.644** | 0.731** |
| 9. Upper division STEM course Enrollment  |    |       |         |         |         |         |         |         | 1       | 0.985** | 0.264** | 0.970** | 0.459** |
| 10. Upper division STEM credit enrollment |    |       |         |         |         |         |         |         |         | 1       | 0.230** | 0.987** | 0.431** |
| 11. Upper division STEM course pass-rate  |    |       |         |         |         |         |         |         |         |         | 1       | 0.411** | 0.510** |
| 12. Upper division STEM credits earned    |    |       |         |         |         |         |         |         |         |         |         | 1       | 0.496** |
| 13. Upper division STEM GPA               |    |       |         |         |         |         |         |         |         |         |         |         | 1       |

\* $p < 0.05$ ; \*\* $p < 0.01$  (two-tailed)



**Table S6.** The corresponding evaluation phase, activity and outcome from the Corwin model for selected survey items from STEMcats Survey 1 for assessing perceived gains from SRE toward enhancing STEM retention

| Evaluation phase as per Corwin model | Outcome assessed [i.e. Likert-survey item from STEMcats Survey 1]                 | Corresponding activity/outcome from Corwin model <sup>‡</sup>                                                                                                                                                                                                                                                                                                                      |
|--------------------------------------|-----------------------------------------------------------------------------------|------------------------------------------------------------------------------------------------------------------------------------------------------------------------------------------------------------------------------------------------------------------------------------------------------------------------------------------------------------------------------------|
| Early                                | ‘Improved your scientific thinking’                                               | -A corresponding outcome is not depicted in the Corwin Model. By logical reasoning, this survey item is an outcome of a combination of depicted activities ‘Read and evaluate current science literature’, ‘Select or design all or part of data collection methods’, ‘Collect novel data’, ‘Analyze results’ in the Corwin Model<br>-By logical reasoning, a ‘short-term’ outcome |
|                                      | ‘Improved your science/STEM knowledge’                                            | -Outcome: ‘Increased content knowledge’<br>-A ‘short-term’ outcome                                                                                                                                                                                                                                                                                                                 |
|                                      | ‘Improved your experimentation skills’                                            | -Outcome: ‘Increased technical skills’<br>-A ‘short-term’ outcome                                                                                                                                                                                                                                                                                                                  |
| Middle                               | ‘Improved your comfort level with other STEM students’                            | -Activity: ‘Work collaboratively with peers’<br>-Outcome: ‘Increased collaboration skills’<br>-A ‘short-term’ outcome                                                                                                                                                                                                                                                              |
|                                      | ‘Improved your comfort-level with faculty’                                        | -A corresponding outcome is not depicted in the Corwin Model. By logical reasoning, this survey item is an outcome that will lead to ‘Sense of belonging to a larger community’<br>-By logical reasoning, a ‘short-term’ outcome                                                                                                                                                   |
|                                      | ‘Enhanced your sense that you are part of a group’                                | -Outcome: ‘Sense of belonging to a larger community’<br>-A ‘short-term’ outcome and a ‘hub’                                                                                                                                                                                                                                                                                        |
| Late                                 | ‘Enhanced your motivation/enthusiasm for STEM’                                    | -Outcome: ‘Increased motivation in science’<br>-A ‘medium-term’ outcome                                                                                                                                                                                                                                                                                                            |
|                                      | ‘Enhanced your motivation towards accomplishing graduation from your STEM degree’ | -Outcome: ‘Persistence in science’<br>-A ‘long-term’ outcome, a ‘pinnacle’ outcome                                                                                                                                                                                                                                                                                                 |

<sup>‡</sup>A schematic of the Corwin model is available in Figure 5 of Corwin et al., 2015

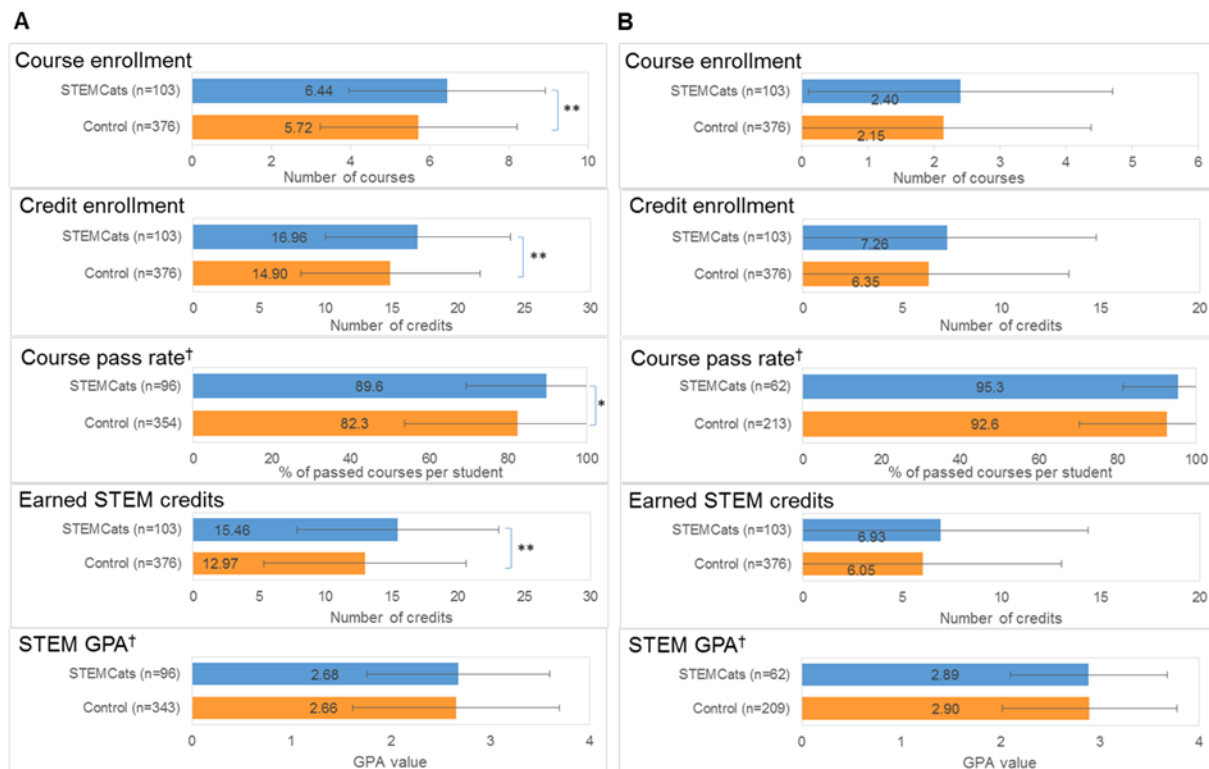

**Figure S2.** Descriptive data comparison for STEM academic performance outcomes between STEMCats and non-STEMCats control, as of end of the sophomore-year. Mean performance values are depicted for (A) lower-division STEM courses, and (B) upper-division STEM courses, with error bars denoting SD. Further details are available in Supplemental Table S4. \* $p < 0.05$ ; \*\* $p < 0.01$  (two-tailed independent samples t-test). <sup>†</sup>Calculation is limited to the number of students who took the respective courses.

**Table S7.** Multiple linear regression predicting course enrollment, credit enrollment and course pass-rate for lower-division STEM courses, as of the end of sophomore-year, for STEMcats and control groups from Biology and Chemistry majors

|                                                                                                               | Course Enrollment                                       |                                 |       | Credit Enrollment                                       |                                 |       | Pass-Rate                                               |                                 |        |
|---------------------------------------------------------------------------------------------------------------|---------------------------------------------------------|---------------------------------|-------|---------------------------------------------------------|---------------------------------|-------|---------------------------------------------------------|---------------------------------|--------|
|                                                                                                               | Standardi zed coefficient                               | Unstandardized coefficients     |       | Standardi zed coefficient                               | Unstandardized coefficients     |       | Standardi zed coefficient                               | Unstandardized coefficients     |        |
|                                                                                                               | <i>Beta</i>                                             | B                               | SE B  | <i>Beta</i>                                             | B                               | SE B  | <i>Beta</i>                                             | B                               | SE B   |
| Constant                                                                                                      |                                                         | -3.010**                        | 1.061 |                                                         | -9.537**                        | 2.919 |                                                         | -1.931                          | 11.590 |
| STEMCat (1) vs. non-STEMCat (0)                                                                               | 0.193                                                   | 1.135***<br>( <i>p</i> < 0.001) | 0.252 | 0.198                                                   | 3.222***<br>( <i>p</i> < 0.001) | 0.692 | 0.146                                                   | 9.306***<br>( <i>p</i> < 0.001) | 2.633  |
| High-School GPA (weighted out of 5)                                                                           | 0.240                                                   | 1.193***                        | 0.278 | 0.229                                                   | 3.146***                        | 0.765 | 0.131                                                   | 7.306*                          | 3.006  |
| ACT Math                                                                                                      | 0.281                                                   | 0.151***                        | 0.032 | 0.300                                                   | 0.447***                        | 0.088 | 0.156                                                   | 0.963**                         | 0.337  |
| Female (1) vs. Male (0)                                                                                       | -0.004                                                  | -0.019                          | 0.223 | -0.007                                                  | -0.104                          | 0.613 | -0.023                                                  | -1.218                          | 2.314  |
| STEM minority (1) vs. STEM non-minority (0)                                                                   | -0.102                                                  | -0.669*                         | 0.302 | -0.107                                                  | -1.942*                         | 0.830 | -0.005                                                  | -0.339                          | 3.234  |
| Out of state (1) vs. in state (0)                                                                             | -0.090                                                  | -0.490*                         | 0.239 | -0.076                                                  | -1.139                          | 0.658 | 0.000                                                   | 0.010                           | 2.529  |
| Pell grant recipient (1) vs. non-recipient (0)                                                                | -0.067                                                  | -0.356                          | 0.247 | -0.072                                                  | -1.055                          | 0.679 | -0.064                                                  | -3.739                          | 2.596  |
| First generation (1) vs. not first generation (0)                                                             | 0.014                                                   | 0.082                           | 0.258 | 0.015                                                   | 0.240                           | 0.711 | -0.028                                                  | -1.790                          | 2.738  |
| Academic major at the beginning of research experience: Chemistry (1) vs. Biology (0)                         | -0.014                                                  | -0.085                          | 0.265 | -0.001                                                  | -0.021                          | 0.729 | -0.081                                                  | -5.285                          | 2.712  |
| UK first semester GPA                                                                                         | 0.299                                                   | 0.789***                        | 0.133 | 0.286                                                   | 2.084***                        | 0.367 | 0.440                                                   | 13.184***                       | 1.445  |
| UK first semester earned credit hours                                                                         | -0.452                                                  | -0.064***                       | 0.008 | -0.439                                                  | -0.171***                       | 0.023 | -0.042                                                  | -0.067                          | 0.089  |
| St. Error of Regression                                                                                       | 2.078                                                   |                                 |       | 5.716                                                   |                                 |       | 21.214                                                  |                                 |        |
| R <sup>2</sup>                                                                                                | 28.6%                                                   |                                 |       | 29.2%                                                   |                                 |       | 36.3%                                                   |                                 |        |
| Adjusted R <sup>2</sup>                                                                                       | 26.7%                                                   |                                 |       | 27.3%                                                   |                                 |       | 34.5%                                                   |                                 |        |
| F statistic                                                                                                   | F = 14.834, df = (11, 407), <i>p</i> < 0.001            |                                 |       | F = 15.268, df = (11, 407), <i>p</i> < 0.001            |                                 |       | F = 19.948, df = (11, 385), <i>p</i> < 0.001            |                                 |        |
| Sample sizes<br><i>n</i> <sub>1</sub> = number of STEMcats,<br><i>n</i> <sub>2</sub> = number of non-STEMcats | <i>n</i> <sub>1</sub> = 91, <i>n</i> <sub>2</sub> = 328 |                                 |       | <i>n</i> <sub>1</sub> = 91, <i>n</i> <sub>2</sub> = 328 |                                 |       | <i>n</i> <sub>1</sub> = 86, <i>n</i> <sub>2</sub> = 311 |                                 |        |
| * <i>p</i> < 0.05; ** <i>p</i> < 0.01; *** <i>p</i> < 0.001                                                   |                                                         |                                 |       |                                                         |                                 |       |                                                         |                                 |        |

**Table S8.** Multiple linear regression predicting credits earned and GPA for lower-division STEM courses, as of the end of sophomore-year, for STEMcats and control groups from Biology and Chemistry majors

|                                                                                                               | Credits Earned                                          |                                 |       | STEM GPA                                                |                              |       |
|---------------------------------------------------------------------------------------------------------------|---------------------------------------------------------|---------------------------------|-------|---------------------------------------------------------|------------------------------|-------|
|                                                                                                               | Standardized coefficient                                | Unstandardized coefficients     |       | Standardized coefficient                                | Unstandardized coefficients  |       |
|                                                                                                               | <i>Beta</i>                                             | B                               | SE B  | <i>Beta</i>                                             | B                            | SE B  |
| Constant                                                                                                      |                                                         | -16.271***                      | 3.113 |                                                         | -3.070***                    | 0.326 |
| STEMCat (1) vs. non-STEMCat (0)                                                                               | 0.206                                                   | 3.769***<br>( <i>p</i> < 0.001) | 0.738 | 0.051                                                   | 0.132<br>( <i>p</i> = 0.079) | 0.075 |
| High-School GPA (weighted out of 5.000)                                                                       | 0.224                                                   | 3.462***                        | 0.815 | 0.197                                                   | 0.446***                     | 0.085 |
| ACT Math                                                                                                      | 0.272                                                   | 0.457***                        | 0.094 | 0.310                                                   | 0.078***                     | 0.010 |
| Female (1) vs. Male (0)                                                                                       | 0.004                                                   | 0.055                           | 0.654 | -0.005                                                  | -0.011                       | 0.066 |
| STEM minority (1) vs. STEM non-minority (0)                                                                   | -0.078                                                  | -1.605                          | 0.885 | 0.024                                                   | 0.073                        | 0.092 |
| Out of state (1) vs. in state (0)                                                                             | -0.062                                                  | -1.052                          | 0.702 | 0.019                                                   | 0.045                        | 0.072 |
| Pell grant recipient (1) vs. non-recipient (0)                                                                | -0.064                                                  | -1.066                          | 0.724 | -0.064                                                  | -0.155*                      | 0.074 |
| First generation (1) vs. not first generation (0)                                                             | -0.016                                                  | -0.287                          | 0.758 | -0.010                                                  | -0.025                       | 0.078 |
| Academic major at the beginning of research experience: Chemistry (1) vs. Biology (0)                         | -0.038                                                  | -0.719                          | 0.777 | -0.030                                                  | 0.078                        | 0.078 |
| UK first semester GPA                                                                                         | 0.406                                                   | 3.342***                        | 0.391 | 0.512                                                   | 0.630***                     | 0.041 |
| UK first semester earned credit hours                                                                         | -0.366                                                  | -0.161***                       | 0.024 | 0.016                                                   | 0.001                        | 0.003 |
| St. Error of Regression                                                                                       | 6.095                                                   |                                 |       | 0.607                                                   |                              |       |
| R <sup>2</sup>                                                                                                | 36.7%                                                   |                                 |       | 69.3%                                                   |                              |       |
| Adjusted R <sup>2</sup>                                                                                       | 34.9%                                                   |                                 |       | 68.5%                                                   |                              |       |
| F statistic                                                                                                   | F = 21.411, df = (11, 407), <i>p</i> < 0.001            |                                 |       | F = 79.726, df = (11, 388), <i>p</i> < 0.001            |                              |       |
| Sample sizes<br><i>n</i> <sub>1</sub> = number of STEMcats,<br><i>n</i> <sub>2</sub> = number of non-STEMcats | <i>n</i> <sub>1</sub> = 91, <i>n</i> <sub>2</sub> = 328 |                                 |       | <i>n</i> <sub>1</sub> = 88, <i>n</i> <sub>2</sub> = 312 |                              |       |
| * <i>p</i> < 0.05; *** <i>p</i> < 0.001                                                                       |                                                         |                                 |       |                                                         |                              |       |

**Table S9.** Multiple linear regression predicting course enrollment, credit enrollment and course pass-rate for upper-division STEM courses, as of the end of sophomore-year, for STEMcats and control groups from Biology and Chemistry majors

|                                                                                                               | Course Enrollment                                      |                               |       | Credit Enrollment                                       |                               |       | Pass-Rate                                               |                              |        |
|---------------------------------------------------------------------------------------------------------------|--------------------------------------------------------|-------------------------------|-------|---------------------------------------------------------|-------------------------------|-------|---------------------------------------------------------|------------------------------|--------|
|                                                                                                               | Standardized coefficient                               | Unstandardized coefficients   |       | Standardized coefficient                                | Unstandardized coefficients   |       | Standardized coefficient                                | Unstandardized coefficients  |        |
|                                                                                                               | <i>Beta</i>                                            | B                             | SE B  | <i>Beta</i>                                             | B                             | SE B  | <i>Beta</i>                                             | B                            | SE B   |
| Constant                                                                                                      |                                                        | -5.615***                     | 0.773 |                                                         | -15.256***                    | 2.508 |                                                         | 42.819**                     | 15.647 |
| STEMCat (1) vs. non-STEMCat (0)                                                                               | 0.078                                                  | 0.425*<br>( <i>p</i> = 0.021) | 0.183 | 0.080                                                   | 1.402*<br>( <i>p</i> = 0.019) | 0.595 | 0.095                                                   | 4.466<br>( <i>p</i> = 0.133) | 2.961  |
| High-School GPA (weighted out of 5)                                                                           | 0.126                                                  | 0.582**                       | 0.202 | 0.103                                                   | 1.518*                        | 0.657 | 0.101                                                   | 4.687                        | 3.497  |
| ACT Math                                                                                                      | 0.282                                                  | 0.141***                      | 0.023 | 0.268                                                   | 0.430***                      | 0.076 | 0.036                                                   | 0.204                        | 0.428  |
| Female (1) vs. Male (0)                                                                                       | -0.042                                                 | -0.196                        | 0.162 | -0.062                                                  | -0.916                        | 0.527 | 0.059                                                   | 2.417                        | 2.612  |
| STEM minority (1) vs. STEM non-minority (0)                                                                   | -0.018                                                 | -0.109                        | 0.220 | -0.020                                                  | -0.387                        | 0.713 | -0.010                                                  | -0.668                       | 4.353  |
| Out of state (1) vs. in state (0)                                                                             | -0.010                                                 | -0.049                        | 0.174 | -0.006                                                  | -0.096                        | 0.565 | 0.061                                                   | 2.750                        | 2.932  |
| Pell grant recipient (1) vs. non-recipient (0)                                                                | 0.031                                                  | 0.151                         | 0.180 | 0.030                                                   | 0.476                         | 0.583 | 0.082                                                   | 3.823                        | 3.145  |
| First generation (1) vs. not first generation (0)                                                             | -0.026                                                 | -0.140                        | 0.188 | -0.022                                                  | -0.372                        | 0.611 | -0.015                                                  | -0.805                       | 3.388  |
| Academic major at the beginning of research experience: Chemistry (1) vs. Biology (0)                         | -0.128                                                 | -0.731***                     | 0.193 | -0.172                                                  | -3.132***                     | 0.626 | -0.065                                                  | -3.102                       | 3.039  |
| UK first semester GPA                                                                                         | 0.247                                                  | 0.603***                      | 0.097 | 0.217                                                   | 1.702***                      | 0.315 | 0.216                                                   | 7.151**                      | 2.348  |
| UK first semester earned credit hours                                                                         | 0.276                                                  | 0.036***                      | 0.006 | 0.313                                                   | 0.131***                      | 0.020 | 0.027                                                   | 0.030                        | 0.086  |
| St. Error of Regression                                                                                       | 1.513                                                  |                               |       | 4.911                                                   |                               |       | 19.224                                                  |                              |        |
| R <sup>2</sup>                                                                                                | 56.0%                                                  |                               |       | 54.7%                                                   |                               |       | 10.8%                                                   |                              |        |
| Adjusted R <sup>2</sup>                                                                                       | 54.8%                                                  |                               |       | 53.4%                                                   |                               |       | 6.6%                                                    |                              |        |
| F statistic                                                                                                   | F = 47.024, df = (11, 407), <i>p</i> < 0.001           |                               |       | F = 44.601, df = (11, 407), <i>p</i> < 0.001            |                               |       | F = 19.224, df = (11, 238), <i>p</i> < 0.001            |                              |        |
| Sample sizes<br><i>n</i> <sub>1</sub> = number of STEMcats,<br><i>n</i> <sub>2</sub> = number of non-STEMcats | <i>n</i> <sub>1</sub> = 91 <i>n</i> <sub>2</sub> = 328 |                               |       | <i>n</i> <sub>1</sub> = 91, <i>n</i> <sub>2</sub> = 328 |                               |       | <i>n</i> <sub>1</sub> = 58, <i>n</i> <sub>2</sub> = 192 |                              |        |
| * <i>p</i> < 0.05; ** <i>p</i> < 0.01; *** <i>p</i> < 0.001                                                   |                                                        |                               |       |                                                         |                               |       |                                                         |                              |        |

**Table S10.** Multiple linear regression predicting credits earned and GPA for upper-division STEM courses, as of the end of sophomore-year, for STEMcats and control groups from Biology and Chemistry majors

|                                                                                                              | Credits Earned                                          |                               |       | GPA                                                     |                              |       |
|--------------------------------------------------------------------------------------------------------------|---------------------------------------------------------|-------------------------------|-------|---------------------------------------------------------|------------------------------|-------|
|                                                                                                              | Standardized coefficient                                | Unstandardized coefficients   |       | Standardized coefficient                                | Unstandardized coefficients  |       |
|                                                                                                              | <i>Beta</i>                                             | B                             | SE B  | <i>Beta</i>                                             | B                            | SE B  |
| Constant                                                                                                     |                                                         | -15.512***                    | 2.476 |                                                         | -2.109***                    | 0.560 |
| STEMCat (1) vs. non-STEMCat (0)                                                                              | 0.080                                                   | 1.391*<br>( <i>p</i> = 0.018) | 0.587 | 0.097                                                   | 0.212<br>( <i>p</i> = 0.055) | 0.110 |
| High-School GPA (weighted out of 5.000)                                                                      | 0.106                                                   | 1.549*                        | 0.648 | 0.191                                                   | 0.404**                      | 0.128 |
| ACT Math                                                                                                     | 0.259                                                   | 0.411***                      | 0.075 | 0.218                                                   | 0.056***                     | 0.016 |
| Female (1) vs. Male (0)                                                                                      | -0.055                                                  | -0.809                        | 0.520 | -0.010                                                  | -0.019                       | 0.097 |
| STEM minority (1) vs. STEM non-minority (0)                                                                  | -0.015                                                  | -0.286                        | 0.704 | -0.072                                                  | -0.219                       | 0.162 |
| Out of state (1) vs. in state (0)                                                                            | 0.001                                                   | 0.021                         | 0.558 | 0.053                                                   | 0.111                        | 0.109 |
| Pell grant recipient (1) vs. non-recipient (0)                                                               | 0.036                                                   | 0.569                         | 0.576 | 0.074                                                   | 0.160                        | 0.117 |
| First generation (1) vs. not first generation (0)                                                            | -0.019                                                  | -0.329                        | 0.603 | -0.025                                                  | -0.060                       | 0.126 |
| Academic major at the beginning of research experience: Chemistry (1) vs. Biology (0)                        | -0.170                                                  | -3.075***                     | 0.618 | -0.128                                                  | -0.283*                      | 0.112 |
| UK first semester GPA                                                                                        | 0.219                                                   | 1.698***                      | 0.311 | 0.367                                                   | 0.555***                     | 0.087 |
| UK first semester earned credit hours                                                                        | 0.326                                                   | 0.135***                      | 0.019 | 0.050                                                   | 0.003                        | 0.003 |
| St. Error of Regression                                                                                      | 4.847                                                   |                               |       | 0.717                                                   |                              |       |
| R <sup>2</sup>                                                                                               | 55.0%                                                   |                               |       | 42.2%                                                   |                              |       |
| Adjusted R <sup>2</sup>                                                                                      | 53.8%                                                   |                               |       | 39.6%                                                   |                              |       |
| F statistic                                                                                                  | F = 45.293, df = (11, 407), <i>p</i> < 0.001            |                               |       | F = 15.893, df = (11, 239), <i>p</i> < 0.001            |                              |       |
| Sample sizes<br><i>n</i> <sub>1</sub> = number of STEMcats<br><i>n</i> <sub>2</sub> = number of non-STEMcats | <i>n</i> <sub>1</sub> = 91, <i>n</i> <sub>2</sub> = 328 |                               |       | <i>n</i> <sub>1</sub> = 58, <i>n</i> <sub>2</sub> = 193 |                              |       |
| * <i>p</i> < 0.05; ** <i>p</i> < 0.01; *** <i>p</i> < 0.001                                                  |                                                         |                               |       |                                                         |                              |       |
